# Supplementary material for: Profiles of behavioral, social and psychological well-being in old age and their association with mobility-limitation-free survival
Source: publisher site journal article supplement (doi:10.18632/aging.204182), 2022-07-18
Supplement: Supplementary file [file aging-v14i15-204182-supplementary-material-SD1.pdf]

**SUPPLEMENTARY FIGURES**

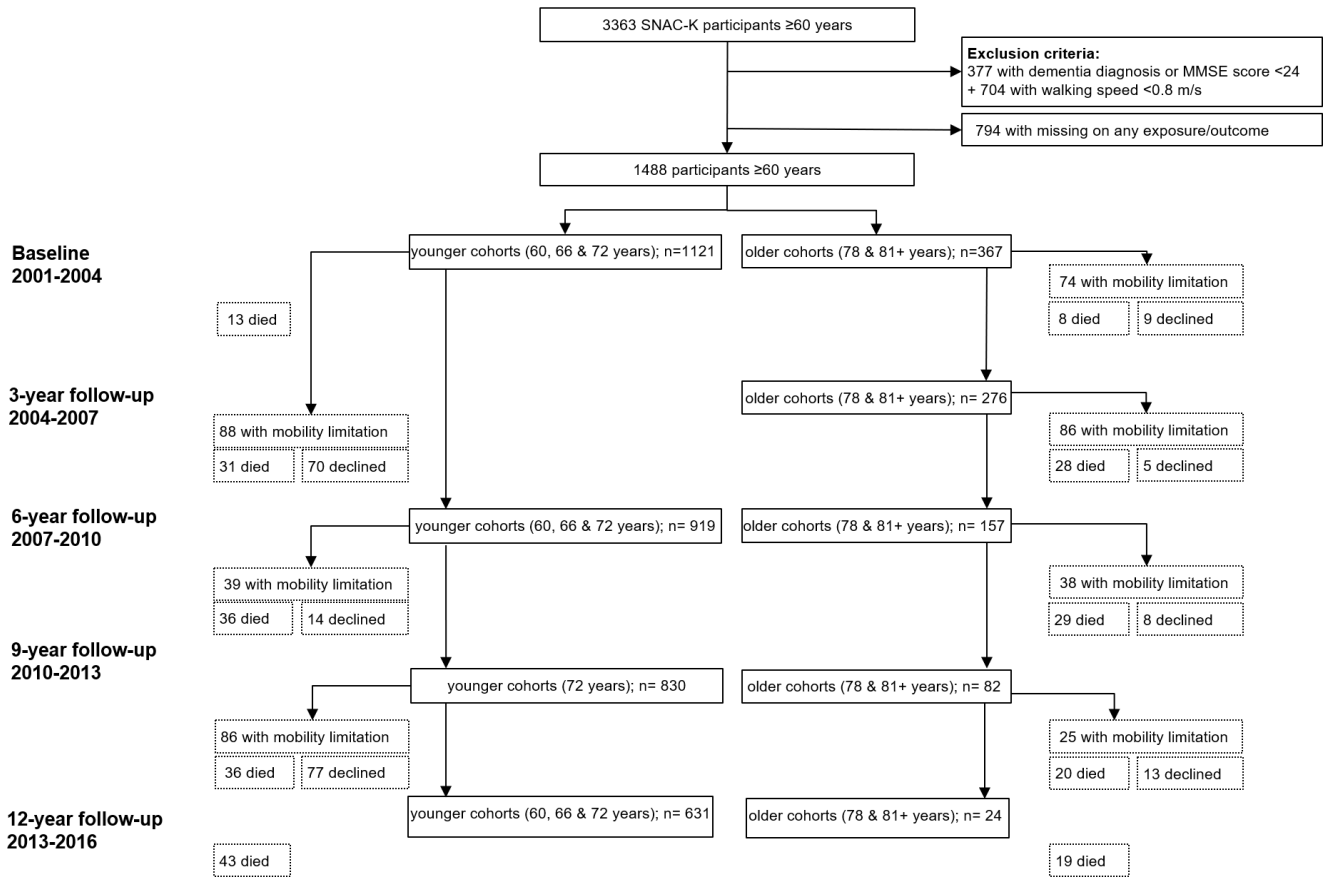

**Supplementary Figure 1. Population flow-chart for baseline and follow-up assessments.**

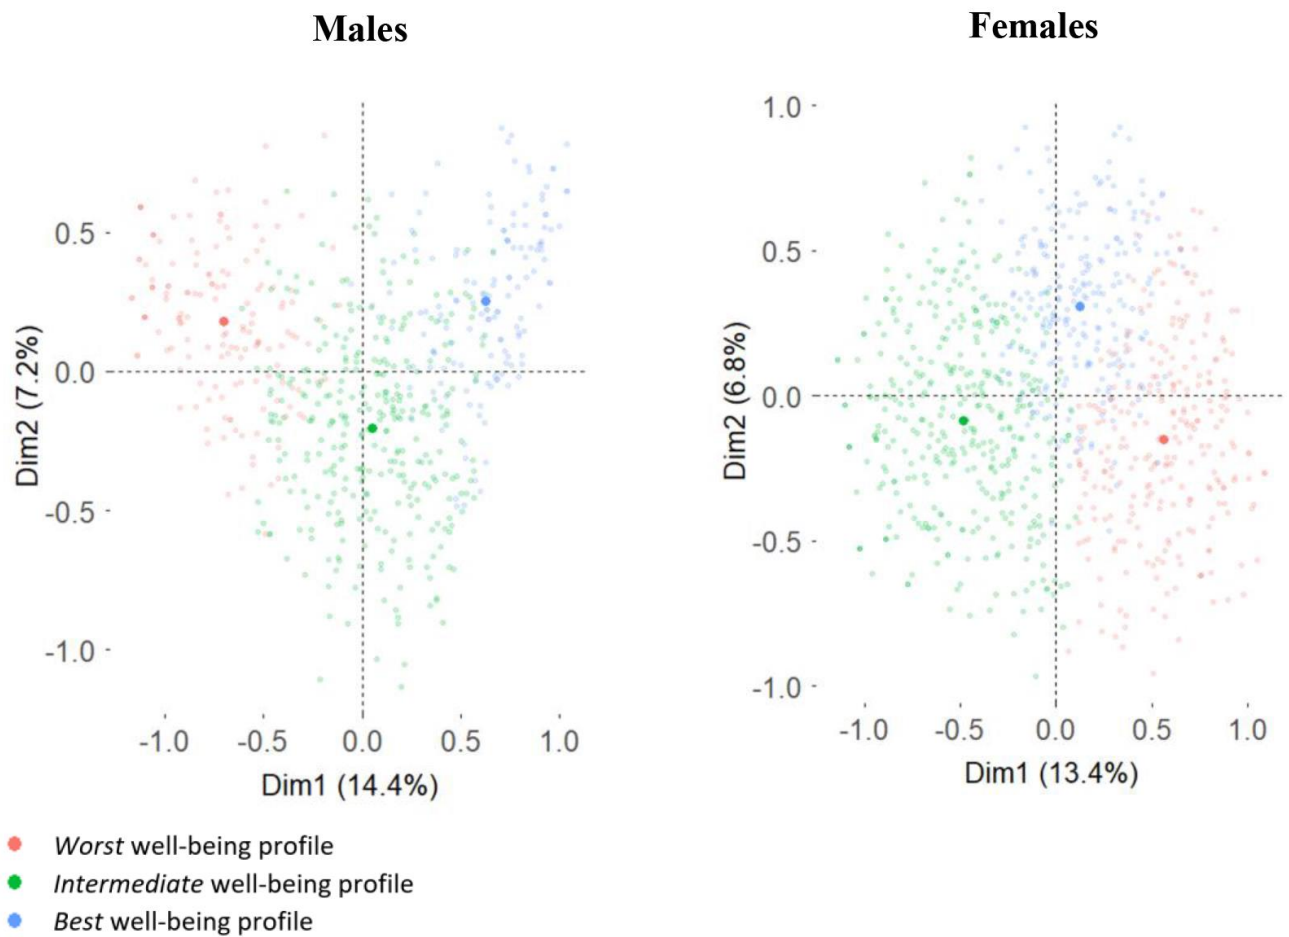

**Supplementary Figure 2. Two-dimensional coordinates for all observations in the study sample derived from multiple component analysis.** The dot color is assigned in accordance with the well-being profile (derived from LCA) corresponding to that observation. The thickness of the dots is proportional to the number of observations located on a given area of the two-dimensional map.
