# Supplementary material for: Profiles of behavioral, social and psychological well-being in old age and their association with mobility-limitation-free survival
Source: publisher site journal article supplement (doi:10.18632/aging.204182), 2022-07-18
Supplement: Supplementary file [file aging-v14i15-204182-supplementary-material-SD2.pdf]

## SUPPLEMENTARY TABLES

**Supplementary Table 1. Baseline characteristics of the study population by walking speed.**

|                                                 | <0.8 m/s (n=230)  | ≥0.8 m/s (n=1488) | p-value          |
|-------------------------------------------------|-------------------|-------------------|------------------|
| <b>Age (mean, SD)</b>                           | <b>79.3 (8.4)</b> | <b>69.1 (8.3)</b> | <b>&lt;0.001</b> |
| <b>Sex (%)</b>                                  |                   |                   |                  |
| Male                                            | 66 (28.7)         | 609 (40.9)        | <b>&lt;0.001</b> |
| Female                                          | 164 (71.3)        | 879 (59.1)        |                  |
| <b>Education (%)</b>                            |                   |                   |                  |
| Elementary                                      | 44 (19.1)         | 141 (9.5)         | <b>&lt;0.001</b> |
| High school                                     | 131 (57.0)        | 707 (47.5)        |                  |
| University                                      | 55 (23.9)         | 640 (43.0)        |                  |
| <b>Number of chronic diseases, median (IQR)</b> | <b>5 (4;7)</b>    | <b>3 (2;4)</b>    | <b>&lt;0.001</b> |
| <b>MMSE score, median (IQR)</b>                 | <b>29 (28;29)</b> | <b>29 (29;30)</b> | <b>&lt;0.001</b> |
| <b>Mediterranean Diet Score (%)</b>             |                   |                   |                  |
| Low                                             | 144 (62.6)        | 684 (46.0)        | <b>&lt;0.001</b> |
| Moderate                                        | 51 (22.2)         | 335 (22.5)        |                  |
| High                                            | 35 (15.2)         | 469 (31.5)        |                  |
| <b>Smoking (%)</b>                              |                   |                   |                  |
| Never                                           | 127 (55.2)        | 619 (41.6)        | <b>&lt;0.001</b> |
| Former                                          | 78 (33.9)         | 639 (42.9)        |                  |
| Current                                         | 25 (10.9)         | 230 (15.5)        |                  |
| <b>Physical leisure activity (%)</b>            |                   |                   |                  |
| No activity                                     | 170 (73.9)        | 403 (27.1)        | <b>&lt;0.001</b> |
| Mild activity                                   | 42 (18.3)         | 534 (35.9)        |                  |
| Intense activity                                | 18 (7.8)          | 551 (37.0)        |                  |
| <b>Mental leisure activity (%)</b>              |                   |                   |                  |
| No activity                                     | 166 (72.2)        | 545 (36.6)        | <b>&lt;0.001</b> |
| Mild activity                                   | 40 (17.4)         | 395 (26.6)        |                  |
| Intense activity                                | 24 (10.4)         | 548 (36.8)        |                  |
| <b>Social leisure activity (%)</b>              |                   |                   |                  |
| Low                                             | 135 (58.7)        | 438 (29.4)        | <b>&lt;0.001</b> |
| Moderate                                        | 56 (24.4)         | 518 (34.8)        |                  |
| High                                            | 39 (17.0)         | 532 (35.8)        |                  |
| <b>Social connections (%)</b>                   |                   |                   |                  |
| Low                                             | 110 (47.8)        | 463 (31.1)        | <b>&lt;0.001</b> |
| Moderate                                        | 84 (36.5)         | 489 (32.9)        |                  |
| High                                            | 36 (15.7)         | 536 (36.0)        |                  |
| <b>Social support (%)</b>                       |                   |                   |                  |
| Low                                             | 116 (50.4)        | 457 (30.7)        | <b>&lt;0.001</b> |
| Moderate                                        | 67 (29.1)         | 506 (34.0)        |                  |
| High                                            | 47 (20.4)         | 525 (35.3)        |                  |
| <b>Life satisfaction (%)</b>                    |                   |                   |                  |
| Low                                             | 137 (59.6)        | 442 (29.7)        | <b>&lt;0.001</b> |
| Moderate                                        | 62 (27.0)         | 538 (36.2)        |                  |
| High                                            | 31 (13.5)         | 508 (34.1)        |                  |
| <b>Negative affect (%)</b>                      |                   |                   |                  |
| High                                            | 86 (37.4)         | 482 (32.4)        | 0.175            |
| Moderate                                        | 58 (25.2)         | 356 (23.9)        |                  |

|                            |            |            |                  |
|----------------------------|------------|------------|------------------|
| Low                        | 86 (37.4)  | 650 (43.7) |                  |
| <b>Positive affect (%)</b> |            |            |                  |
| Low                        | 156 (67.8) | 471 (31.7) |                  |
| Moderate                   | 50 (21.7)  | 587 (39.5) | <b>&lt;0.001</b> |
| High                       | 24 (10.4)  | 430 (28.9) |                  |

SD, standard deviation; IQR, interquartile range; MMSE, Mini Mental State Examination.

**Supplementary Table 2. Goodness-of-fit indices of latent class models with 2-4 class solutions.**

|                         | Males    |         | Females |         |
|-------------------------|----------|---------|---------|---------|
|                         | AIC      | BIC     | AIC     | BIC     |
| <b>2-class solution</b> | 12571.9  | 12752.8 | 18303.5 | 18499.4 |
| <b>3-class solution</b> | 12473.3  | 12746.8 | 18242.5 | 18538.9 |
| <b>4-class solution</b> | 12448.82 | 12815.0 | 18172.9 | 18569.6 |

AIC, Akaike Information Criterion; BIC, Bayesian Information Criterion.  
Smaller values indicate improved model fit.

**Supplementary Table 3. Baseline characteristics of the study population across well-being profiles in males and females.**

|                                                                         | Male (n=609)  |                      |              |                  | Female (n=879) |                      |              |                  |
|-------------------------------------------------------------------------|---------------|----------------------|--------------|------------------|----------------|----------------------|--------------|------------------|
|                                                                         | Worst (n=151) | Intermediate (n=313) | Best (n=145) | p-value          | Worst (n=373)  | Intermediate (n=237) | Best (n=269) | p-value          |
| <b>Age (mean, SD)</b>                                                   | 71.3 (9.3)    | 68.8 (7.9)           | 65.1 (6.0)   | 0.648            | 73.0 (8.9)     | 66.7 (7.1)           | 67.3 (6.8)   | 0.457            |
| <b>Education (%)</b>                                                    |               |                      |              |                  |                |                      |              |                  |
| Elementary                                                              | 27 (17.9)     | 27 (8.6)             | 4 (2.8)      |                  | 56 (15.0)      | 13 (5.5)             | 14 (5.2)     |                  |
| High school                                                             | 72 (47.7)     | 144 (46.0)           | 40 (27.6)    | <b>&lt;0.001</b> | 215 (57.6)     | 119 (50.2)           | 117 (43.5)   | <b>&lt;0.001</b> |
| University                                                              | 52 (34.4)     | 142 (45.4)           | 101 (69.7)   |                  | 102 (27.4)     | 105 (44.3)           | 138 (51.3)   |                  |
| <b>Number of chronic diseases, median (IQR)</b>                         | 3 (2;5)       | 3 (2;4)              | 2 (1;3)      | <b>0.014</b>     | 4 (2;5)        | 3 (2;4)              | 3 (2;4)      | <b>&lt;0.001</b> |
| <b>MMSE score, median (IQR)</b>                                         | 29 (29;30)    | 29 (29;30)           | 30 (29;30)   | <b>&lt;0.001</b> | 29 (29;30)     | 30 (29;30)           | 30 (29;30)   | <b>&lt;0.001</b> |
| <b>Death or mobility limitation during follow-up</b>                    | 99 (65.6)     | 150 (47.9)           | 37 (25.5)    | <b>&lt;0.001</b> | 244 (65.4)     | 86 (36.3)            | 83 (30.9)    | <b>&lt;0.001</b> |
| <b>Death without mobility limitation during follow-up</b>               | 51 (33.8)     | 66 (21.1)            | 16 (11.0)    | <b>&lt;0.001</b> | 79 (21.2)      | 27 (11.4)            | 24 (8.9)     | <b>&lt;0.001</b> |
| <b>Mobility limitation during follow-up (walking speed &lt;0.8 m/s)</b> | 48 (31.8)     | 84 (26.8)            | 21 (14.5)    | <b>0.002</b>     | 165 (44.2)     | 59 (24.9)            | 59 (21.9)    | <b>&lt;0.001</b> |

SD, standard deviation; IQR, interquartile range; MMSE, Mini Mental State Examination.  
p-values for differences observed among worst, intermediate and best profiles estimated using the chi<sup>2</sup> test.

**Supplementary Table 4. Outcome incidence rates by baseline characteristics and well-being indicators in males and females.**

|                                   | <b>Males (n=609)</b> |                       | <b>Females (n=879)</b> |                       |
|-----------------------------------|----------------------|-----------------------|------------------------|-----------------------|
|                                   | <b>Cases/at risk</b> | <b>IR per 1000/py</b> | <b>Cases/at risk</b>   | <b>IR per 1000/py</b> |
| <b>Age (years)</b>                |                      |                       |                        |                       |
| <78                               | 158/472              | 27.5                  | 214/649                | 27.0                  |
| ≥78                               | 128/137              | 137.1                 | 199/230                | 116.2                 |
| <b>Education (%)</b>              |                      |                       |                        |                       |
| Elementary                        | 35/58                | 59.3                  | 57/83                  | 77.0                  |
| High school                       | 133/256              | 49.2                  | 243/451                | 51.8                  |
| University                        | 118/295              | 34.8                  | 113/345                | 26.9                  |
| <b>Number of chronic diseases</b> |                      |                       |                        |                       |
| <2                                | 92/282               | 26.9                  | 88/344                 | 20.2                  |
| ≥2                                | 194/327              | 59.4                  | 325/535                | 61.7                  |
| <b>MMSE score</b>                 |                      |                       |                        |                       |
| <27                               | 13/16                | 122.7                 | 14/18                  | 81.2                  |
| ≥27                               | 273/593              | 41.5                  | 399/861                | 42.2                  |
| <b>Mediterranean Diet Score</b>   |                      |                       |                        |                       |
| Low                               | 143/277              | 47.9                  | 232/426                | 52.5                  |
| Moderate                          | 52/132               | 34.5                  | 89/196                 | 41.0                  |
| High                              | 91/200               | 41.6                  | 92/257                 | 30.2                  |
| <b>Smoking</b>                    |                      |                       |                        |                       |
| Current                           | 45/86                | 48.0                  | 68/144                 | 42.3                  |
| Former                            | 147/321              | 41.8                  | 134/318                | 37.2                  |
| Never                             | 94/202               | 42.2                  | 211/417                | 47.7                  |
| <b>Physical leisure activity</b>  |                      |                       |                        |                       |
| No activity                       | 128/203              | 66.7                  | 193/294                | 69.9                  |
| Mild activity                     | 80/203               | 34.4                  | 133/292                | 40.7                  |
| Intense activity                  | 78/203               | 32.0                  | 87/293                 | 24.1                  |
| <b>Mental leisure activity</b>    |                      |                       |                        |                       |
| No activity                       | 140/205              | 74.4                  | 237/373                | 66.1                  |
| Mild activity                     | 95/201               | 42.2                  | 99/227                 | 38.2                  |
| Intense activity                  | 51/203               | 20.0                  | 77/279                 | 22.3                  |
| <b>Social leisure activity</b>    |                      |                       |                        |                       |
| Low                               | 121/203              | 59.9                  | 162/293                | 54.7                  |
| Moderate                          | 91/203               | 40.4                  | 122/294                | 36.6                  |
| High                              | 74/203               | 30.7                  | 129/292                | 38.6                  |
| <b>Social connections</b>         |                      |                       |                        |                       |
| Low                               | 114/203              | 55.9                  | 165/293                | 54.7                  |
| Moderate                          | 91/203               | 40.3                  | 137/293                | 42.5                  |
| High                              | 81/203               | 33.9                  | 111/293                | 32.7                  |
| <b>Social support</b>             |                      |                       |                        |                       |
| Low                               | 120/203              | 59.4                  | 157/293                | 51.0                  |
| Moderate                          | 82/203               | 35.2                  | 127/298                | 37.8                  |
| High                              | 84/203               | 36.0                  | 129/288                | 40.3                  |
| <b>Life satisfaction</b>          |                      |                       |                        |                       |
| Low                               | 120/209              | 58.1                  | 202/341                | 58.9                  |
| Moderate                          | 113/243              | 41.6                  | 118/252                | 43.4                  |
| High                              | 53/157               | 27.9                  | 93/286                 | 26.7                  |
| <b>Negative affect</b>            |                      |                       |                        |                       |

|                        |         |      |         |      |
|------------------------|---------|------|---------|------|
| High                   | 71/172  | 37.2 | 112/235 | 43.5 |
| Moderate               | 70/148  | 42.4 | 115/283 | 35.3 |
| Low                    | 145/289 | 46.5 | 186/361 | 48.9 |
| <b>Positive affect</b> |         |      |         |      |
| Low                    | 142/243 | 59.7 | 218/348 | 64.5 |
| Moderate               | 89/197  | 39.3 | 109/270 | 35.1 |
| High                   | 55/169  | 26.9 | 86/261  | 27.3 |

IR, incidence rates; py, person-years; MMSE, Mini Mental State Examination.

**Supplementary Table 5. Hazard ratios (HR) and differences in median mobility-limitation-free survival in males and females, and by well-being profiles.**

|                                         | Males (n=609)       |                  |                      |                  |                      |                  | Females (n=879)     |                  |                     |                  |                       |              |
|-----------------------------------------|---------------------|------------------|----------------------|------------------|----------------------|------------------|---------------------|------------------|---------------------|------------------|-----------------------|--------------|
|                                         | Model I             |                  | Model II             |                  | Model III            |                  | Model I             |                  | Model II            |                  | Model III             |              |
| <b>Results from Cox regressions</b>     |                     |                  |                      |                  |                      |                  |                     |                  |                     |                  |                       |              |
|                                         | HR<br>(95%CI)       | p-value          | HR<br>(95%CI)        | p-value          | HR<br>(95%CI)        | p-value          | HR<br>(95%CI)       | p-value          | HR<br>(95%CI)       | p-value          | HR<br>(95%CI)         | p-value      |
| <b>Well-being profiles</b>              |                     |                  |                      |                  |                      |                  |                     |                  |                     |                  |                       |              |
| Worst                                   | Ref                 | -                | Ref                  | -                | Ref                  | -                | Ref                 | -                | Ref                 | -                | Ref                   | -            |
| Intermediate                            | 0.74<br>(0.57;0.95) | <b>0.021</b>     | 0.73<br>(0.56;0.94)  | <b>0.017</b>     | 0.75<br>(0.56;0.99)  | <b>0.048</b>     | 0.76<br>(0.59;0.99) | <b>0.043</b>     | 0.77<br>(0.59;1.00) | <b>0.050</b>     | 0.95<br>(0.74;1.22)   | 0.692        |
| Best                                    | 0.46<br>(0.31;0.69) | <b>&lt;0.001</b> | 0.47<br>(0.31;0.70)  | <b>&lt;0.001</b> | 0.48<br>(0.31;0.74)  | <b>0.001</b>     | 0.58<br>(0.45;0.76) | <b>&lt;0.001</b> | 0.60<br>(0.46;0.78) | <b>&lt;0.001</b> | 0.55<br>(0.37;0.80)   | <b>0.002</b> |
| <b>Results from Laplace regressions</b> |                     |                  |                      |                  |                      |                  |                     |                  |                     |                  |                       |              |
|                                         | $\beta$ (95%CI)     | p-value          | $\beta$ (95%CI)      | p-value          | $\beta$ (95%CI)      | p-value          | $\beta$ (95%CI)     | p-value          | $\beta$ (95%CI)     | p-value          | $\beta$ (95%CI)       | p-value      |
| <b>Well-being profiles</b>              |                     |                  |                      |                  |                      |                  |                     |                  |                     |                  |                       |              |
| Worst                                   | Ref                 | -                | Ref                  | -                | Ref                  | -                | Ref                 | -                | Ref                 | -                | Ref                   | -            |
| Intermediate                            | 1.50<br>(0.13;2.89) | <b>0.032</b>     | 0.94<br>(-0.11;1.99) | <b>0.080</b>     | 0.93<br>(-0.04;1.90) | <b>0.060</b>     | 1.95<br>(0.07;3.82) | <b>0.042</b>     | 1.90<br>(0.49;3.31) | <b>0.008</b>     | 0.10 (-<br>1.49;1.70) | 0.899        |
| Best                                    | 3.32<br>(0.88;5.76) | <b>0.008</b>     | 2.98<br>(1.04;4.93)  | <b>0.003</b>     | 2.99<br>(1.38;4.60)  | <b>&lt;0.001</b> | 3.06<br>(1.60;4.52) | <b>&lt;0.001</b> | 2.96<br>(1.61;4.32) | <b>&lt;0.001</b> | 2.63<br>(0.67;4.59)   | <b>0.008</b> |

HR, Hazard Ratio; CI, Confidence Interval.

Model I: adjusted for age and education.

Model II: additionally adjusted for number of chronic diseases and MMSE score at baseline.

Model III: additionally adjusted for personality traits (openness, extraversion and neuroticism).

**Supplementary Table 6. Hazard ratios (HR) and differences in median mobility-limitation-free survival in males and females and by well-being profiles, after excluding subjects interviewed only at baseline.**

|                                         | Males (n=543)        |              |                      |              |                      |              | Females (n=818)     |                  |                     |                  |                      |                  |
|-----------------------------------------|----------------------|--------------|----------------------|--------------|----------------------|--------------|---------------------|------------------|---------------------|------------------|----------------------|------------------|
|                                         | Model I              |              | Model II             |              | Model III            |              | Model I             |                  | Model II            |                  | Model III            |                  |
|                                         | HR<br>(95%CI)        | p-value      | HR<br>(95%CI)        | p-value      | HR<br>(95%CI)        | p-value      | HR<br>(95%CI)       | p-value          | HR<br>(95%CI)       | p-value          | HR<br>(95%CI)        | p-value          |
| <b>Results from Cox regressions</b>     |                      |              |                      |              |                      |              |                     |                  |                     |                  |                      |                  |
| <b>Well-being profiles</b>              |                      |              |                      |              |                      |              |                     |                  |                     |                  |                      |                  |
| Worst                                   | Ref                  | -            | Ref                  | -            | Ref                  | -            | Ref                 | -                | Ref                 | -                | Ref                  | -                |
| Intermediate                            | 0.81<br>(0.60;1.09)  | 0.170        | 0.79<br>(0.58;1.07)  | 0.122        | 0.84<br>(0.60;1.16)  | 0.290        | 0.80<br>(0.60;1.06) | 0.117            | 0.82<br>(0.62;1.08) | 0.154            | 0.87<br>(0.64;1.16)  | 0.331            |
| Best                                    | 0.55<br>(0.35;0.86)  | <b>0.009</b> | 0.54<br>(0.35;0.85)  | <b>0.008</b> | 0.58<br>(1.12;1.17)  | <b>0.027</b> | 0.57<br>(0.43;0.75) | <b>&lt;0.001</b> | 0.59<br>(0.44;0.79) | <b>&lt;0.001</b> | 0.66<br>(0.48;0.90)  | <b>0.009</b>     |
| <b>Results from Laplace regressions</b> |                      |              |                      |              |                      |              |                     |                  |                     |                  |                      |                  |
|                                         | $\beta$ (95%CI)      | p-value      | $\beta$ (95%CI)      | p-value      | $\beta$ (95%CI)      | p-value      | $\beta$ (95%CI)     | p-value          | $\beta$ (95%CI)     | p-value          | $\beta$ (95%CI)      | p-value          |
| <b>Well-being profiles</b>              |                      |              |                      |              |                      |              |                     |                  |                     |                  |                      |                  |
| Worst                                   | Ref                  | -            | Ref                  | -            | Ref                  | -            | Ref                 | -                | Ref                 | -                | Ref                  | -                |
| Intermediate                            | 0.83<br>(-0.08;1.74) | <b>0.074</b> | 0.59<br>(-1.00;2.23) | 0.477        | 0.44<br>(-1.43;2.32) | 0.645        | 1.74<br>(0.09;3.38) | <b>0.038</b>     | 1.71<br>(0.42;3.01) | <b>0.010</b>     | 1.22<br>(-0.02;2.46) | <b>0.053</b>     |
| Best                                    | 2.15<br>(0.06;4.24)  | <b>0.043</b> | 2.04<br>(-0.47;4.56) | 0.112        | 1.92<br>(-0.56;4.41) | 0.130        | 2.94<br>(1.63;4.26) | <b>&lt;0.001</b> | 2.85<br>(1.46;4.24) | <b>&lt;0.001</b> | 2.25<br>(0.99;3.52)  | <b>&lt;0.001</b> |

HR, Hazard Ratio; CI, Confidence Interval.

Model I: adjusted for age and education.

Model II: additionally adjusted for number of chronic diseases and MMSE score at baseline.

Model III: additionally adjusted for personality traits (openness, extraversion and neuroticism).

**Supplementary Table 7. Hazard ratios (HR) and differences in median mobility-limitation-free survival in males and females and by well-being profiles, after excluding subjects who dropped-out without developing the outcome.**

|                                         | Males (n=549)        |                  |                      |                  |                      |              | Females (n=768)     |                  |                     |                  |                     |                  |
|-----------------------------------------|----------------------|------------------|----------------------|------------------|----------------------|--------------|---------------------|------------------|---------------------|------------------|---------------------|------------------|
|                                         | Model I              |                  | Model II             |                  | Model III            |              | Model I             |                  | Model II            |                  | Model III           |                  |
|                                         | HR<br>(95%CI)        | p-value          | HR<br>(95%CI)        | p-value          | HR<br>(95%CI)        | p-value      | HR<br>(95%CI)       | p-value          | HR<br>(95%CI)       | p-value          | HR<br>(95%CI)       | p-value          |
| <b>Results from Cox regressions</b>     |                      |                  |                      |                  |                      |              |                     |                  |                     |                  |                     |                  |
| <b>Well-being profiles</b>              |                      |                  |                      |                  |                      |              |                     |                  |                     |                  |                     |                  |
| Worst                                   | Ref                  | -                | Ref                  | -                | Ref                  | -            | Ref                 | -                | Ref                 | -                | Ref                 | -                |
| Intermediate                            | 0.76<br>(0.59;0.98)  | <b>0.036</b>     | 0.77<br>(0.60;0.99)  | <b>0.048</b>     | 0.80<br>(0.59;1.07)  | 0.125        | 0.70<br>(0.54;0.91) | <b>0.007</b>     | 0.69<br>(0.53;0.90) | <b>0.006</b>     | 0.70<br>(0.53;0.93) | <b>0.013</b>     |
| Best                                    | 0.47<br>(0.31;0.71)  | <b>&lt;0.001</b> | 0.49<br>(0.33;0.73)  | <b>&lt;0.001</b> | 0.50<br>(0.32;0.78)  | <b>0.002</b> | 0.48<br>(0.37;0.63) | <b>&lt;0.001</b> | 0.49<br>(0.38;0.64) | <b>&lt;0.001</b> | 0.51<br>(0.38;0.68) | <b>&lt;0.001</b> |
| <b>Results from Laplace regressions</b> |                      |                  |                      |                  |                      |              |                     |                  |                     |                  |                     |                  |
|                                         | $\beta$ (95%CI)      | p-value          | $\beta$ (95%CI)      | p-value          | $\beta$ (95%CI)      | p-value      | $\beta$ (95%CI)     | p-value          | $\beta$ (95%CI)     | p-value          | $\beta$ (95%CI)     | p-value          |
| <b>Well-being profiles</b>              |                      |                  |                      |                  |                      |              |                     |                  |                     |                  |                     |                  |
| Worst                                   | Ref                  | -                | Ref                  | -                | Ref                  | -            | Ref                 | -                | Ref                 | -                | Ref                 | -                |
| Intermediate                            | 1.38<br>(-0.02;2.79) | <b>0.054</b>     | 0.80<br>(-0.16;1.75) | 0.103            | 0.70<br>(-0.33;1.73) | 0.184        | 2.16<br>(0.83;3.48) | <b>0.001</b>     | 1.85<br>(0.37;3.32) | <b>0.014</b>     | 1.35<br>(0.20;2.51) | <b>0.022</b>     |
| Best                                    | 3.22<br>(0.86;5.59)  | <b>0.008</b>     | 2.86<br>(1.15;4.56)  | <b>0.001</b>     | 2.78<br>(1.07;4.48)  | <b>0.001</b> | 3.44<br>(2.13;4.77) | <b>&lt;0.001</b> | 3.22<br>(2.12;4.32) | <b>&lt;0.001</b> | 2.90<br>(1.75;4.04) | <b>&lt;0.001</b> |

HR, Hazard Ratio; CI, Confidence Interval.

Model I: adjusted for age and education.

Model II: additionally adjusted for number of chronic diseases and MMSE score at baseline.

Model III: additionally adjusted for personality traits (openness, extraversion and neuroticism).
